# Supplementary material
Source: ML conference proceedings conference paper supplement (https://openreview.net/forum?id=Z2MCyPBT7R)

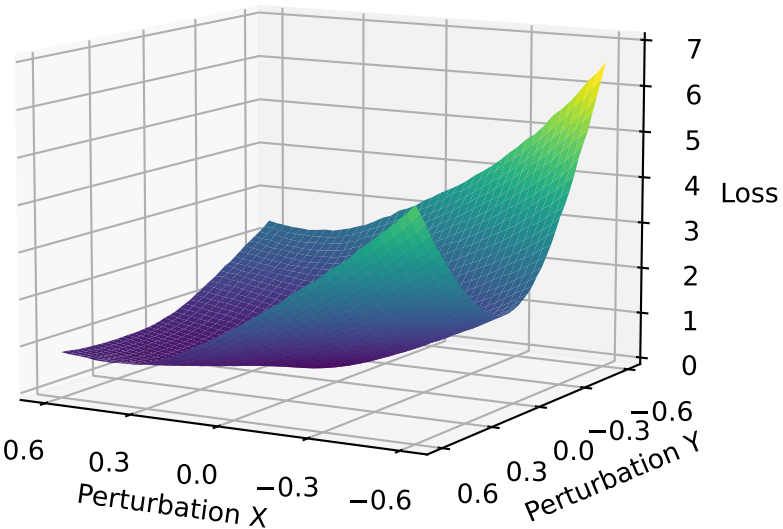

Supplement: supplementary_material [file attachment]

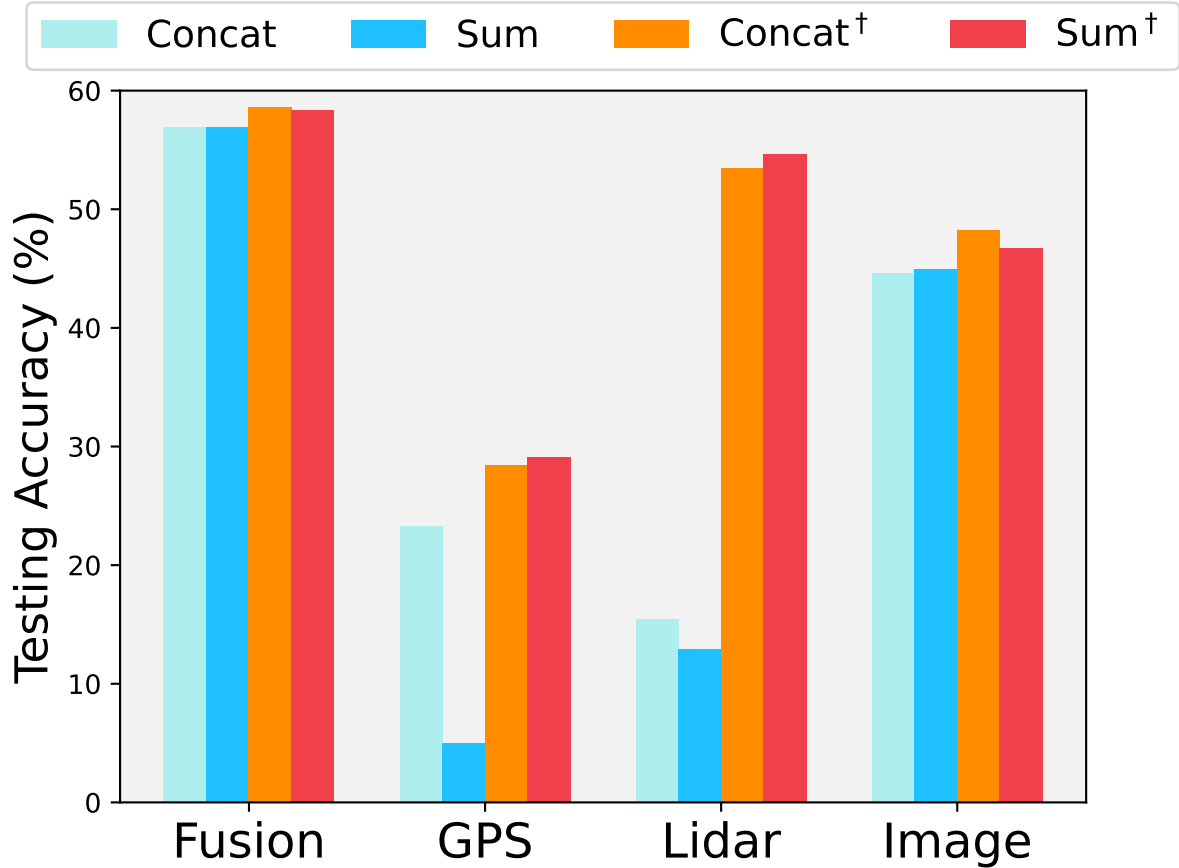

Supplement: supplementary_material [file attachment]

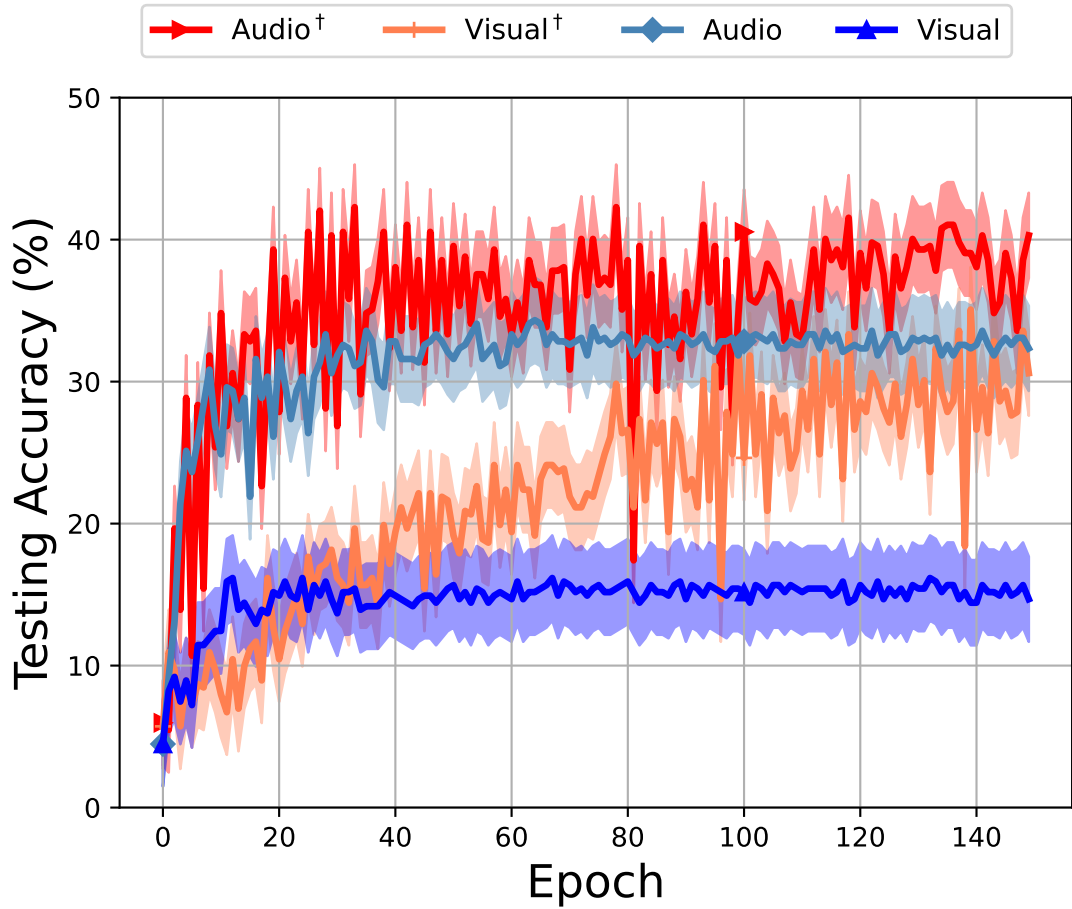

Supplement: supplementary_material [file attachment]

Modal 1<sup>†</sup>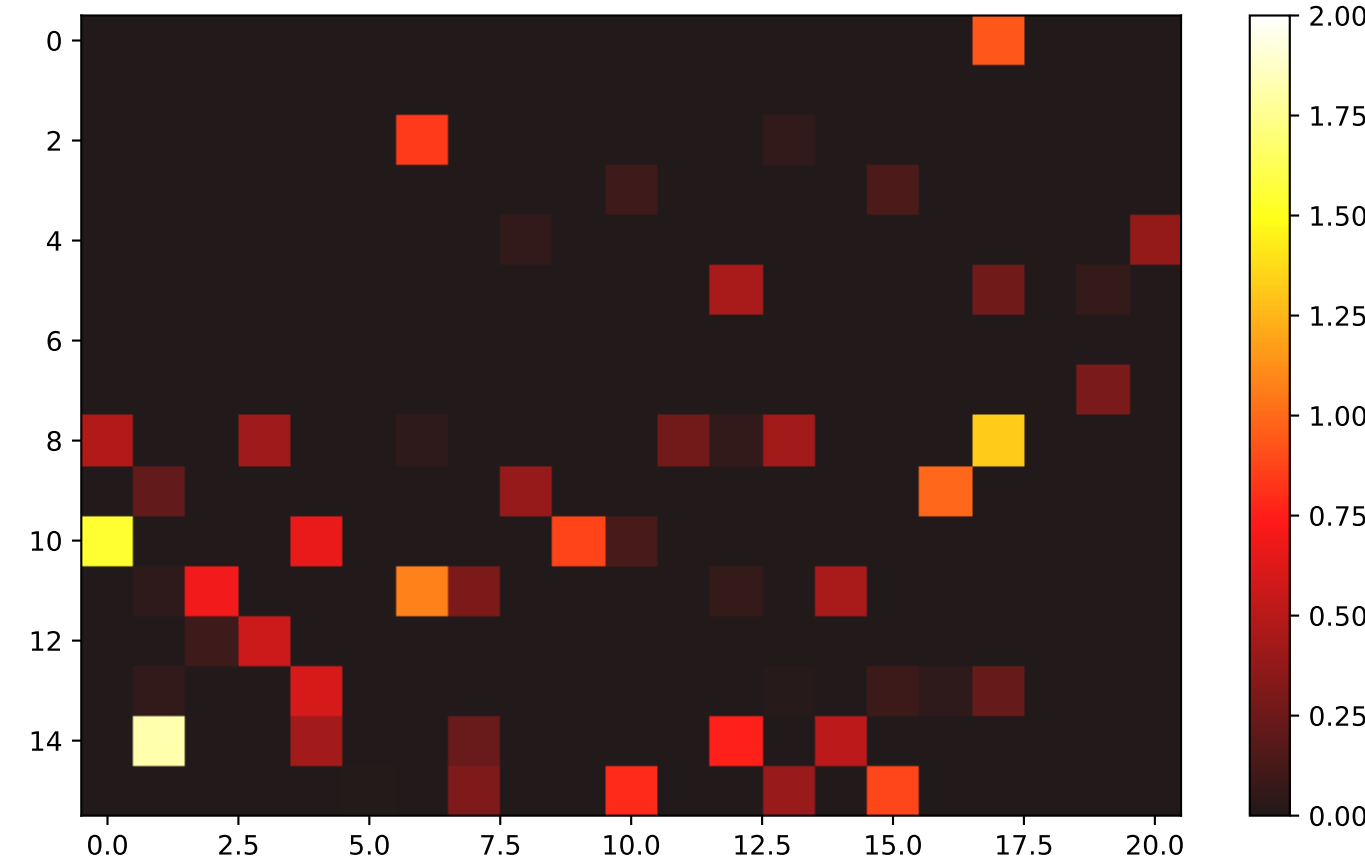Modal 2<sup>†</sup>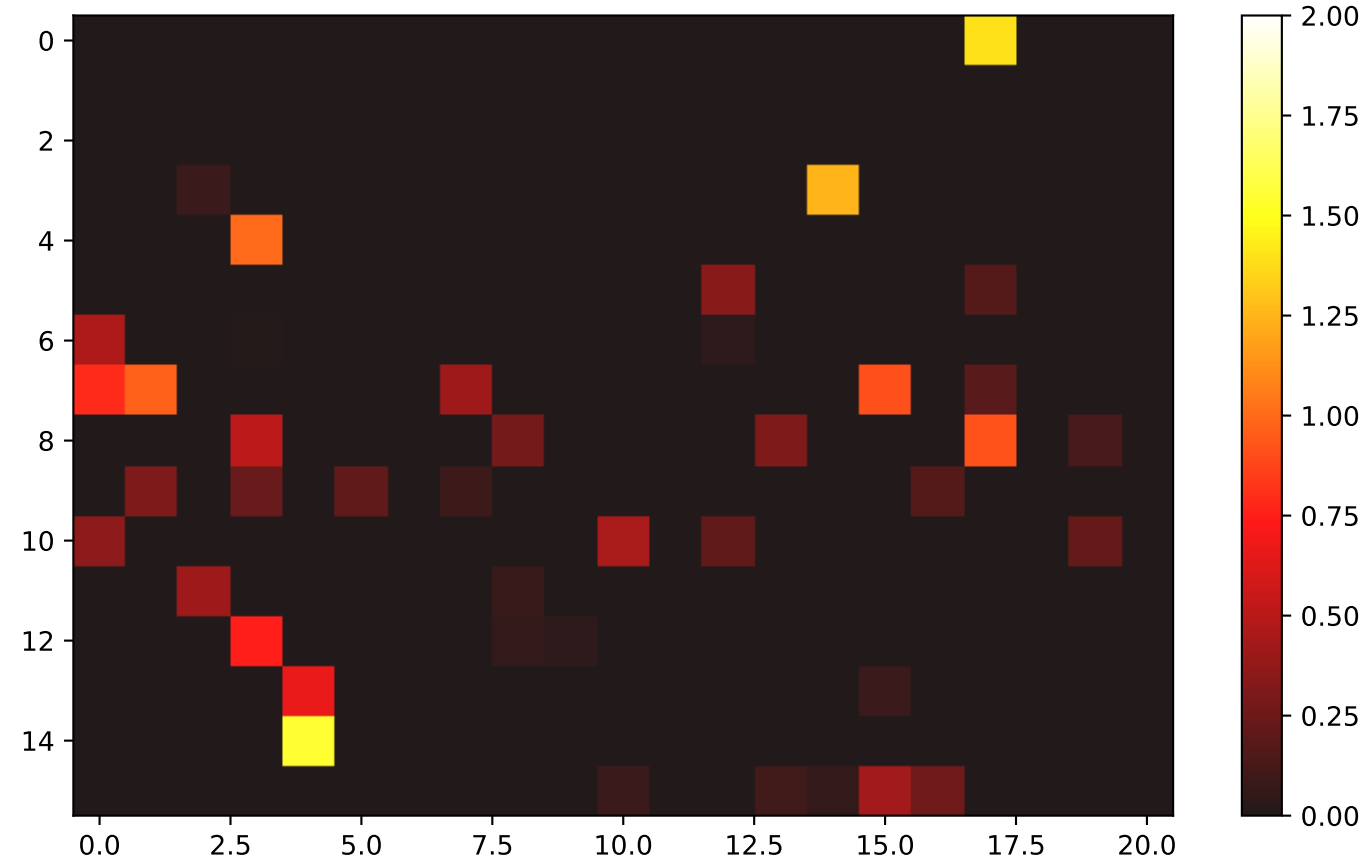

Modal 1

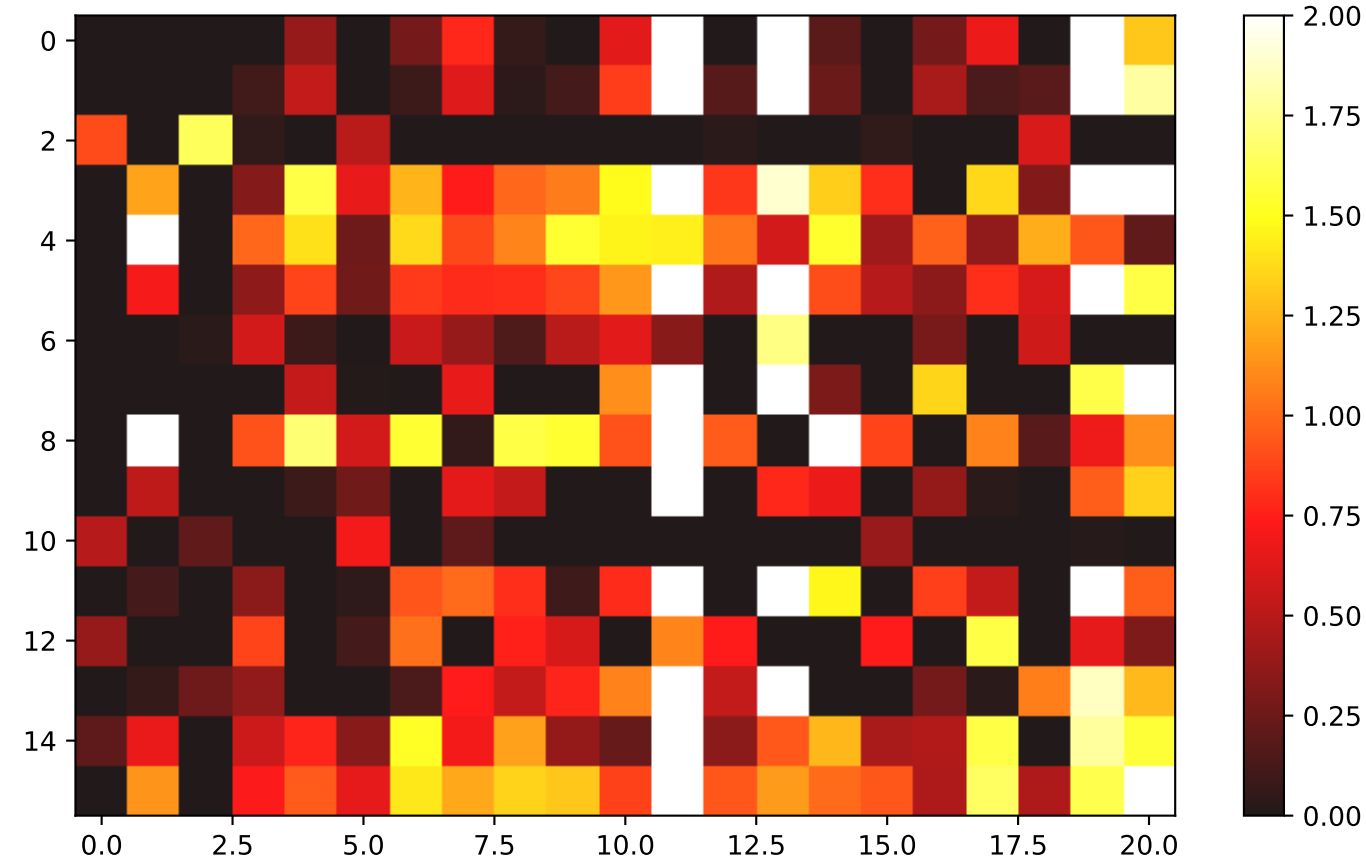

Modal 2

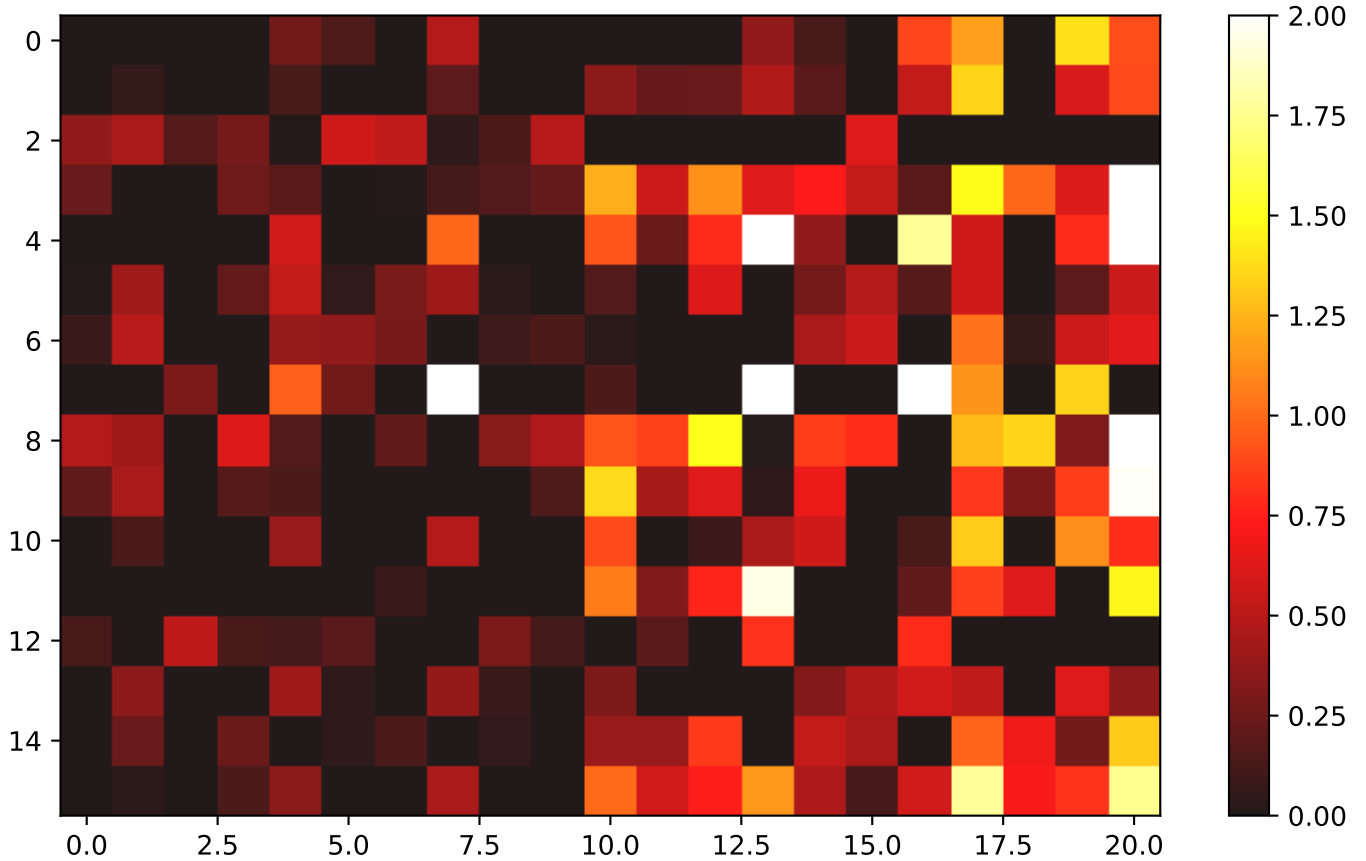

Supplement: supplementary_material [file attachment]

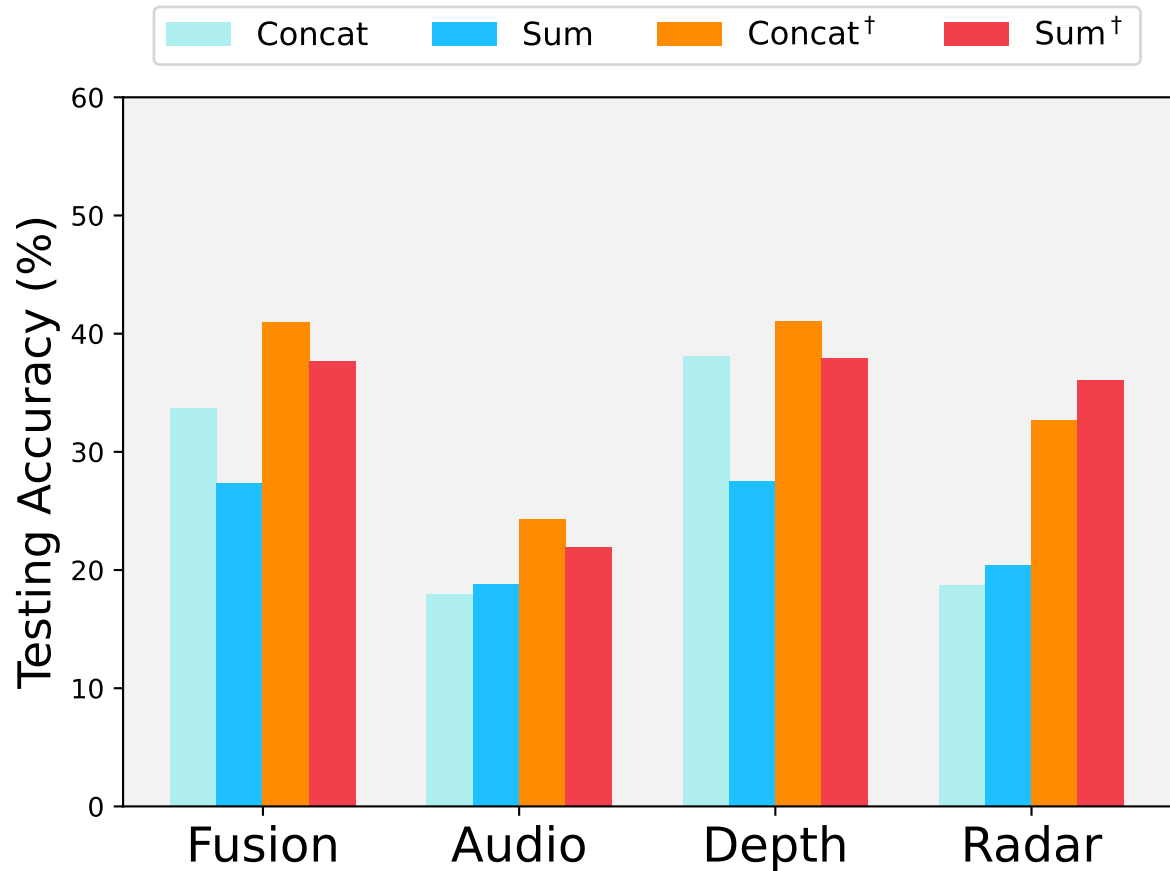

Supplement: supplementary_material [file attachment]

Accelerometer<sup>†</sup>    Skeleton<sup>†</sup>    Accelerometer    Skeleton

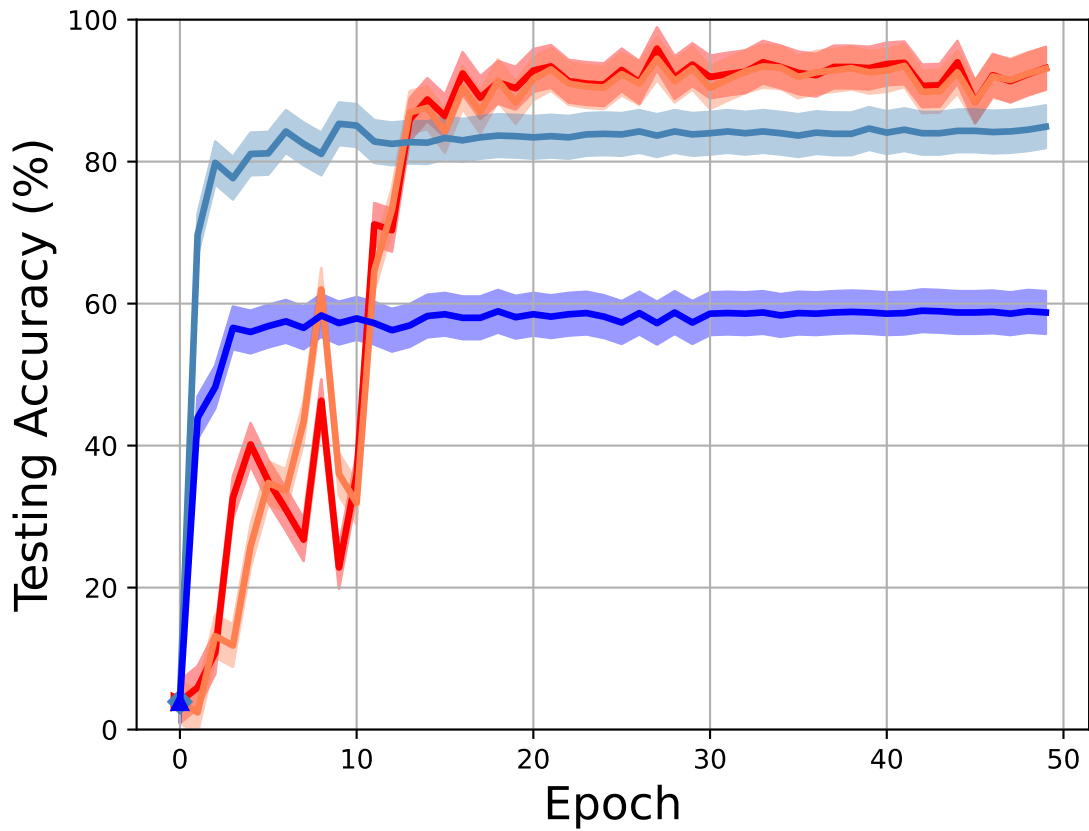

Supplement: supplementary_material [file attachment]

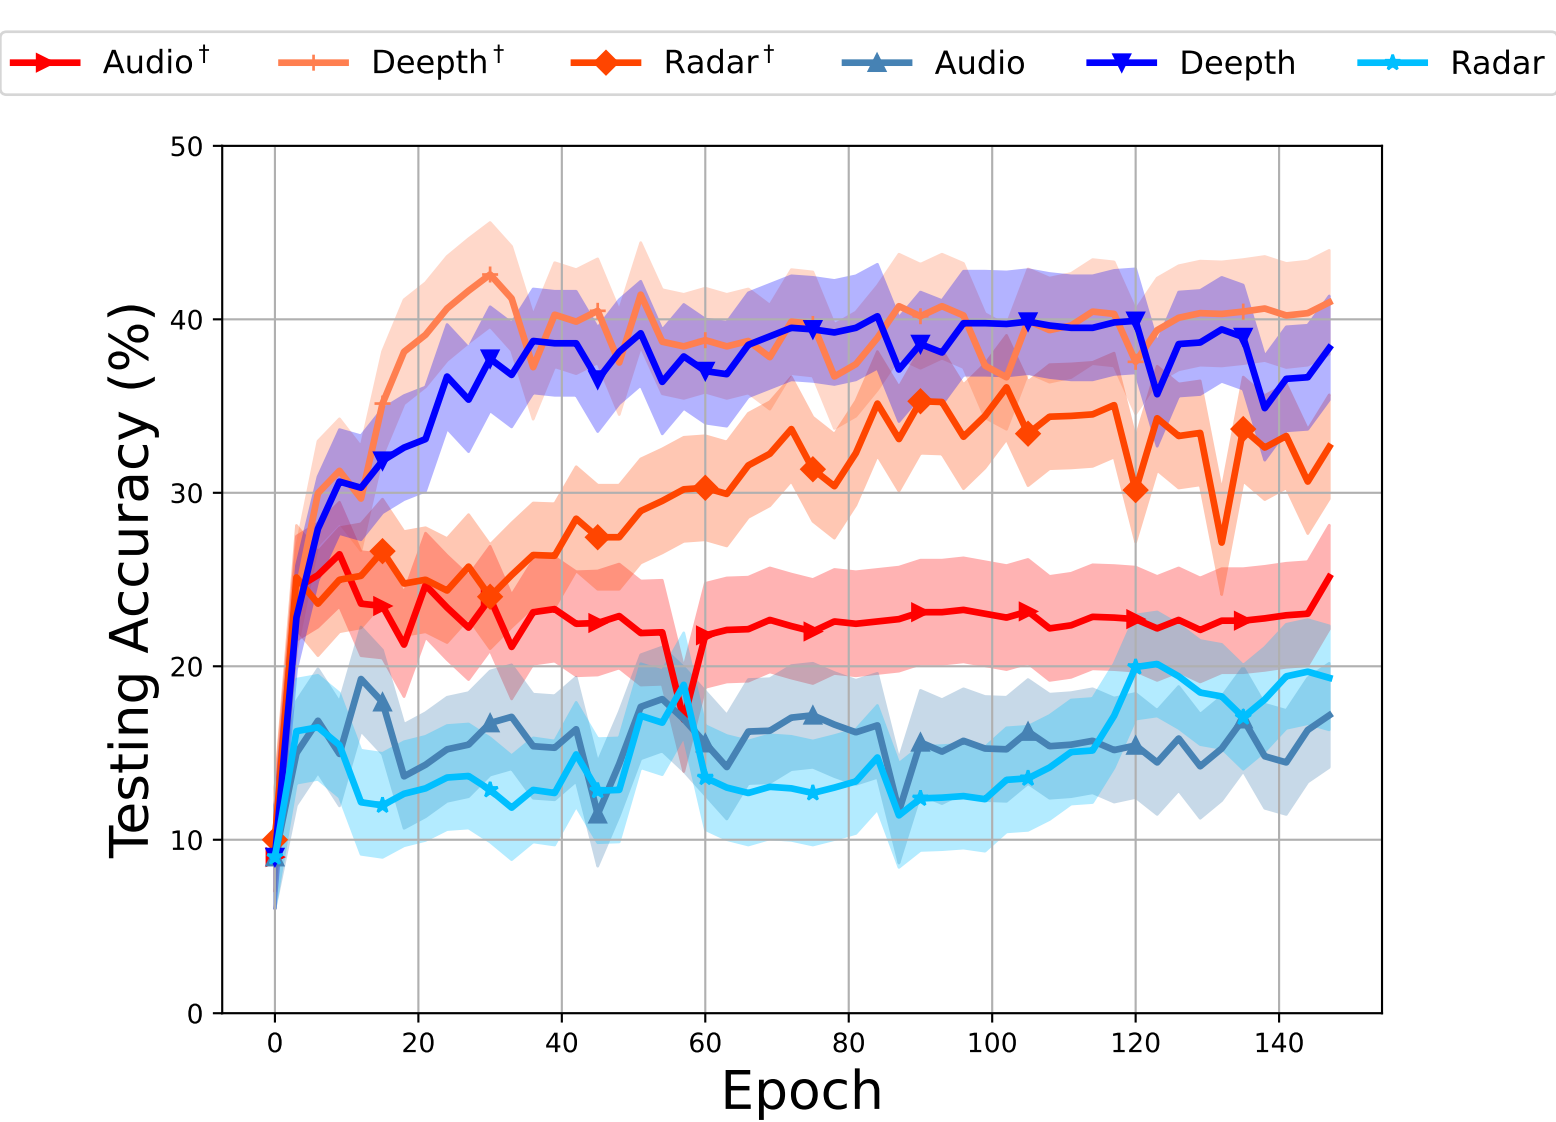

Supplement: supplementary_material [file attachment]

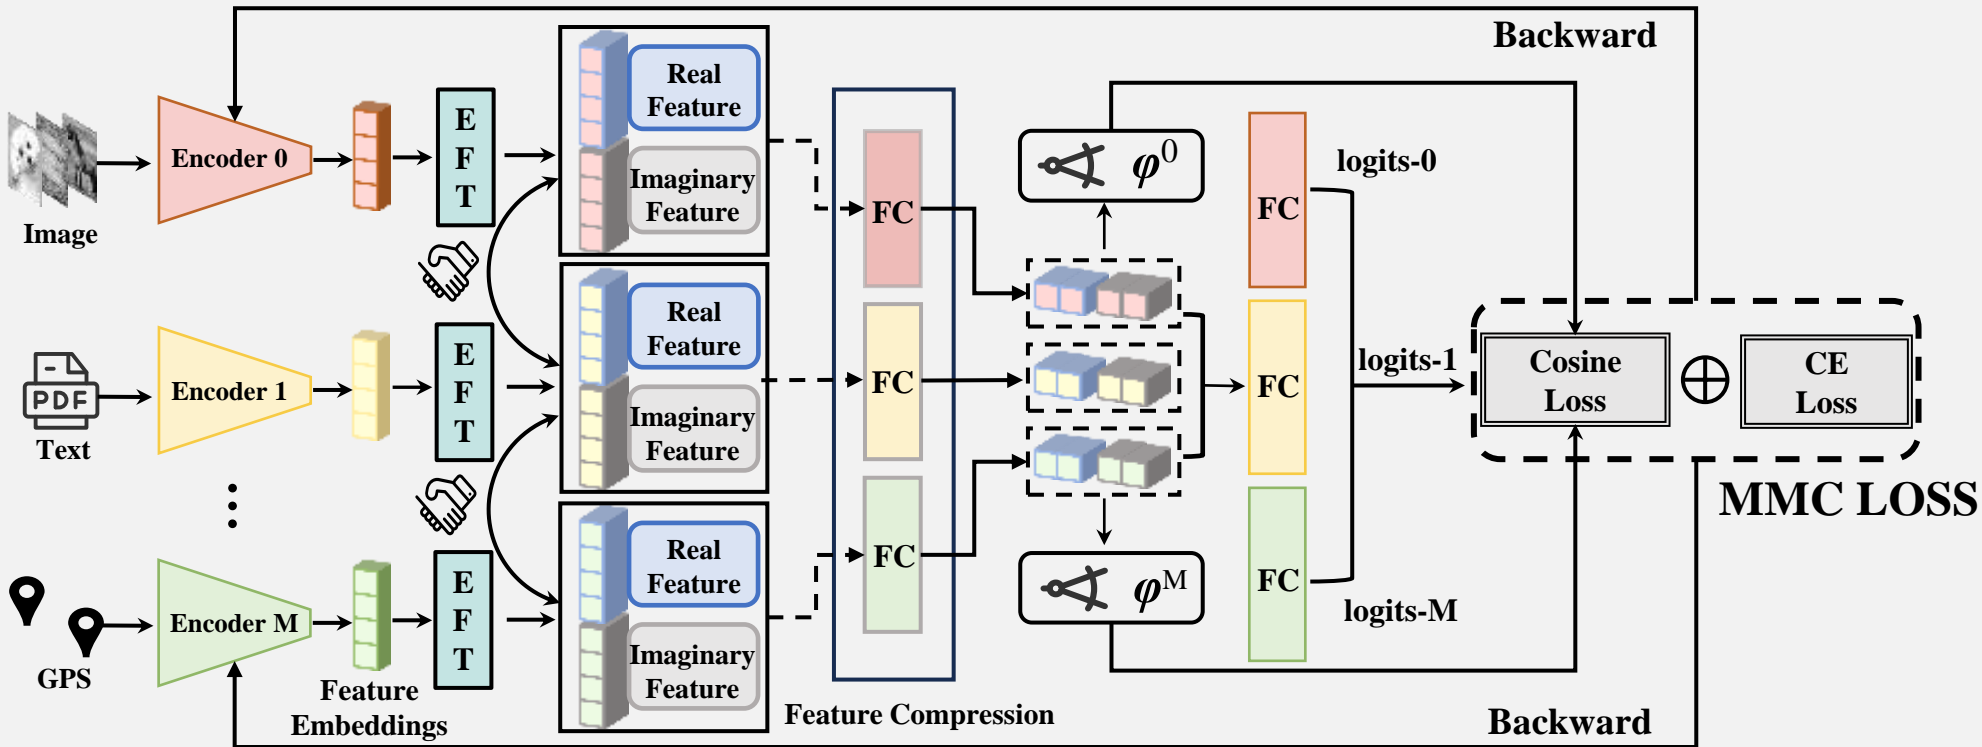

Supplement: supplementary_material [file attachment]

GPS<sup>†</sup> Lidar<sup>†</sup> Image<sup>†</sup> GPS Lidar Image

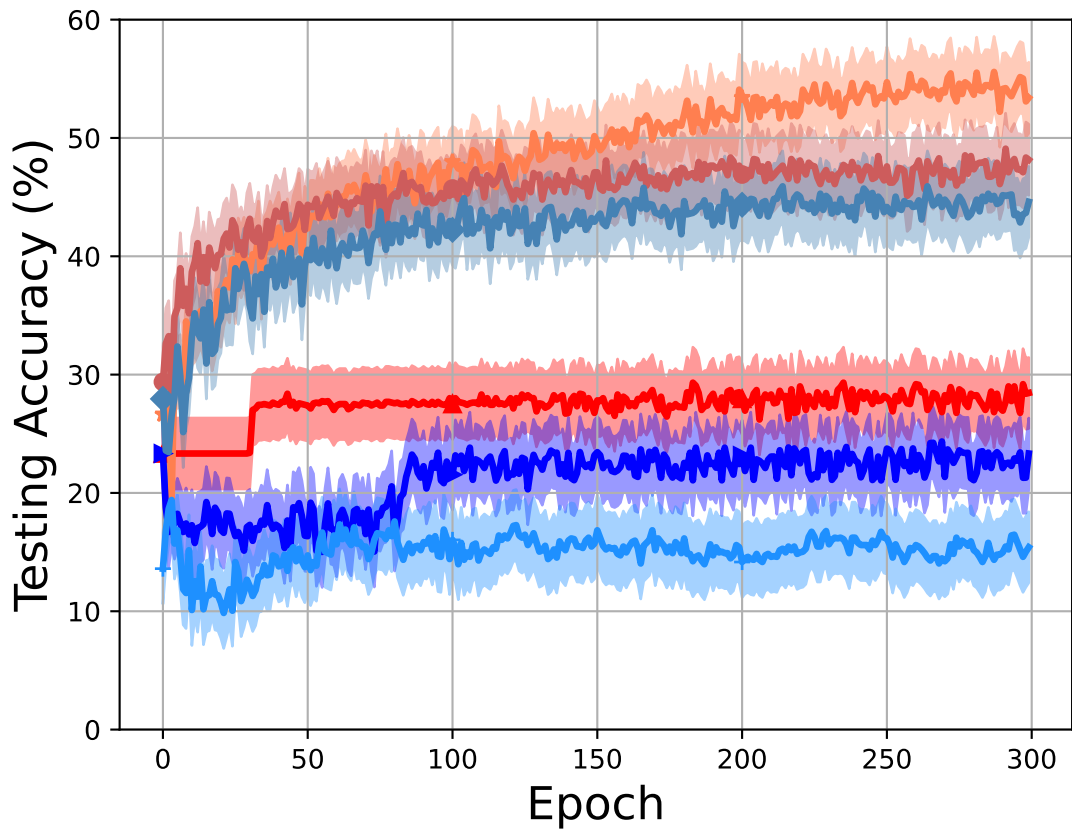

Supplement: supplementary_material [file attachment]

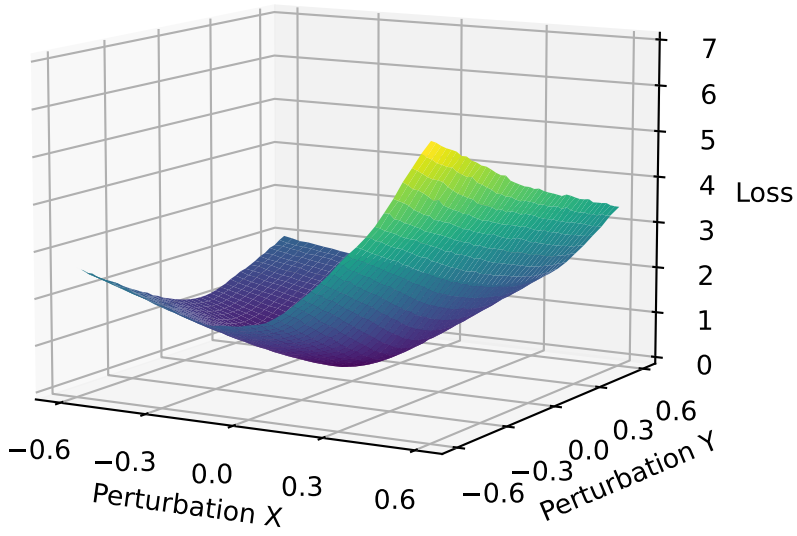

Supplement: supplementary_material [file attachment]
